# Supplementary material for: Differential anti-proliferative and apoptotic effects of lichen species on human prostate carcinoma cells
Source: PubMed Central journal article supplement (PMC7527208; doi:10.1371/journal.pone.0238303), 2020-09-30

*Bryoria capillaris*

Acetonic

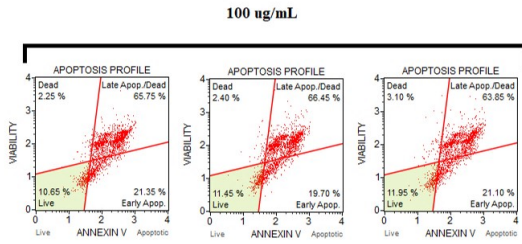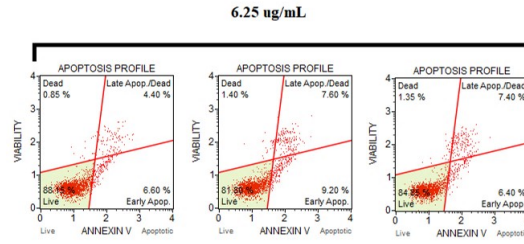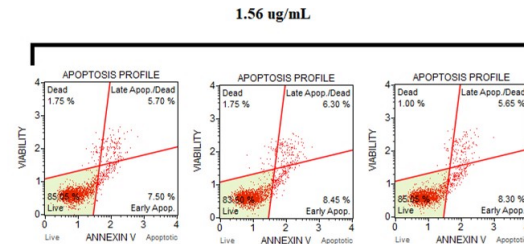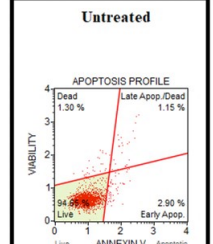

Ethanoic

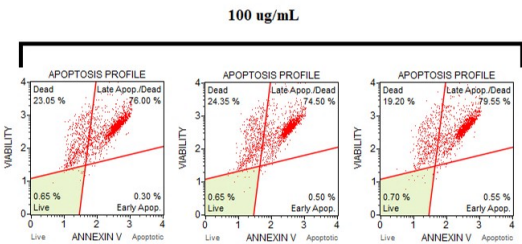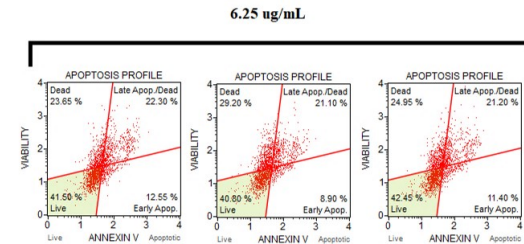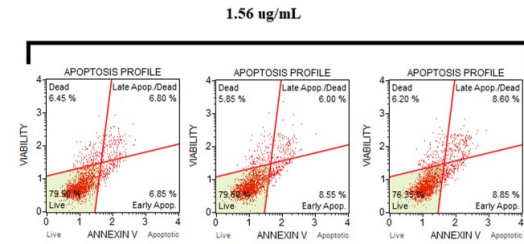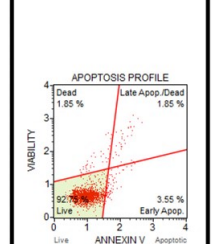

Methanoic

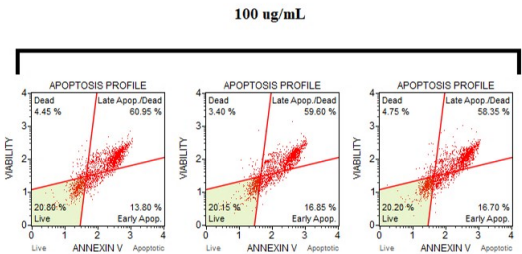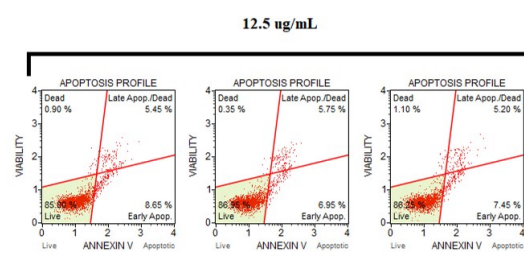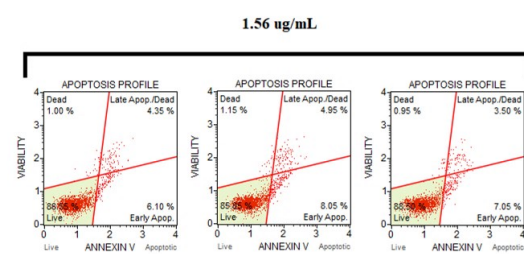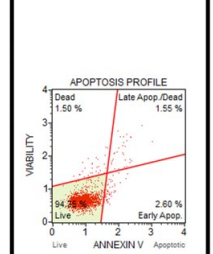

*Cladonia fimbriata*

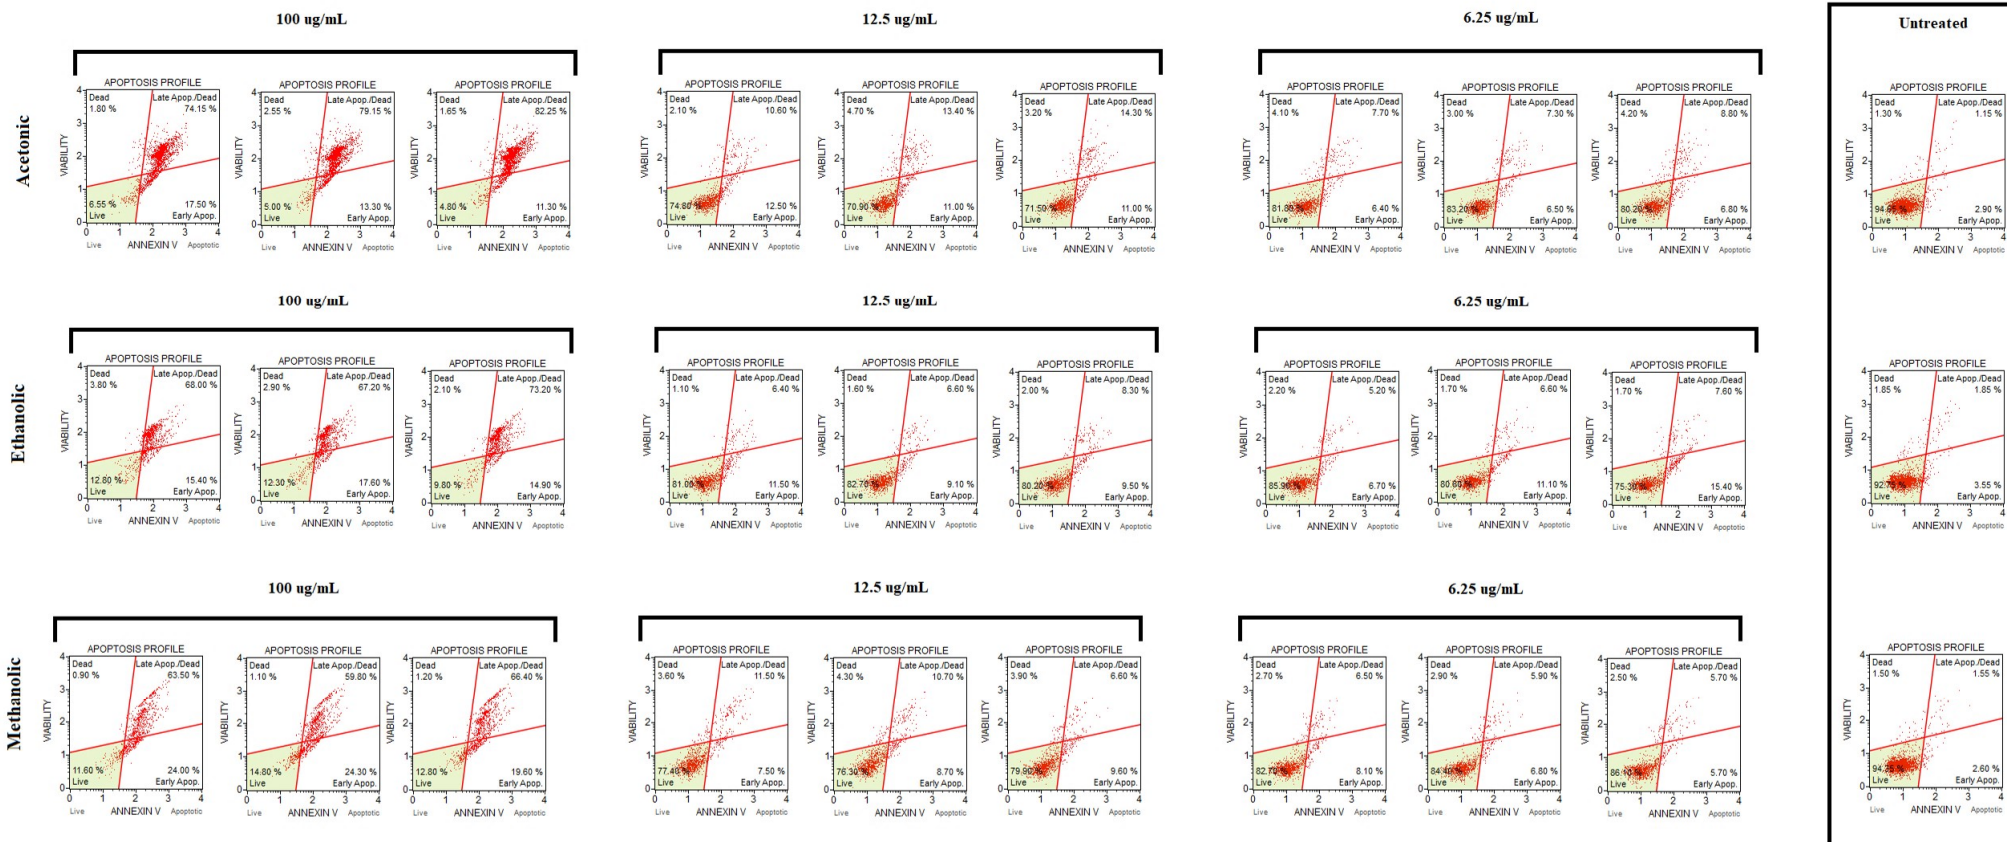

*Evernia divaricata*

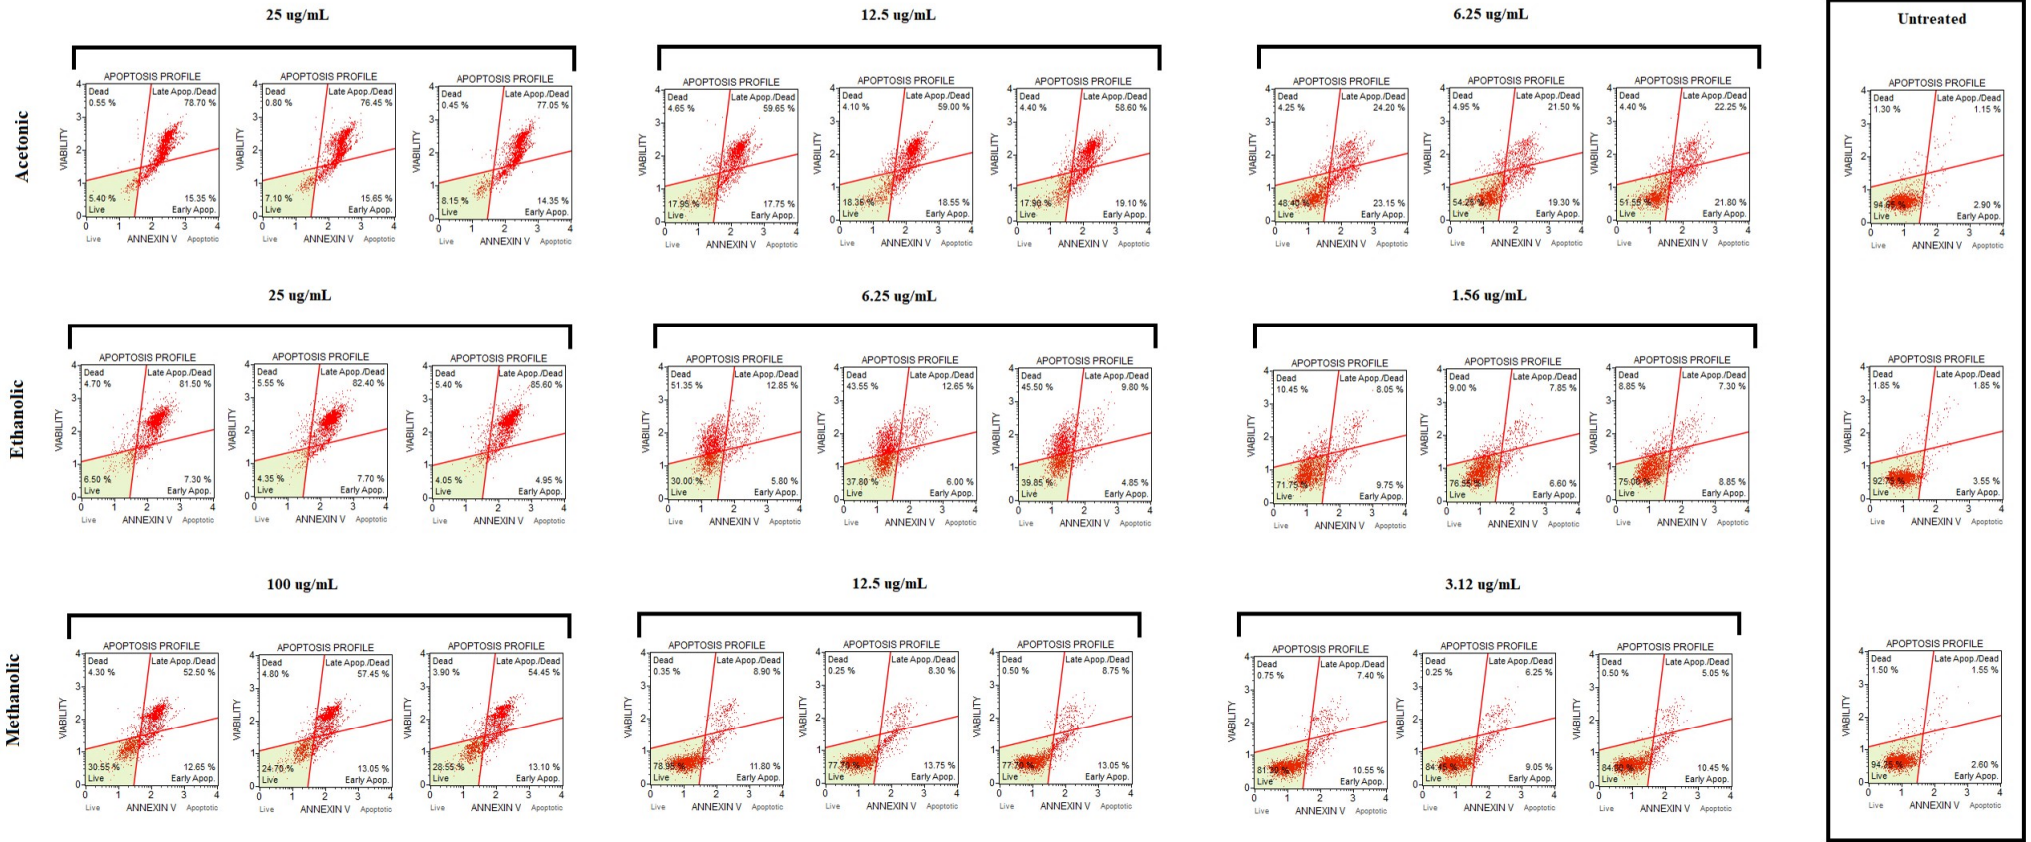

*Hypogymnia tubulosa*

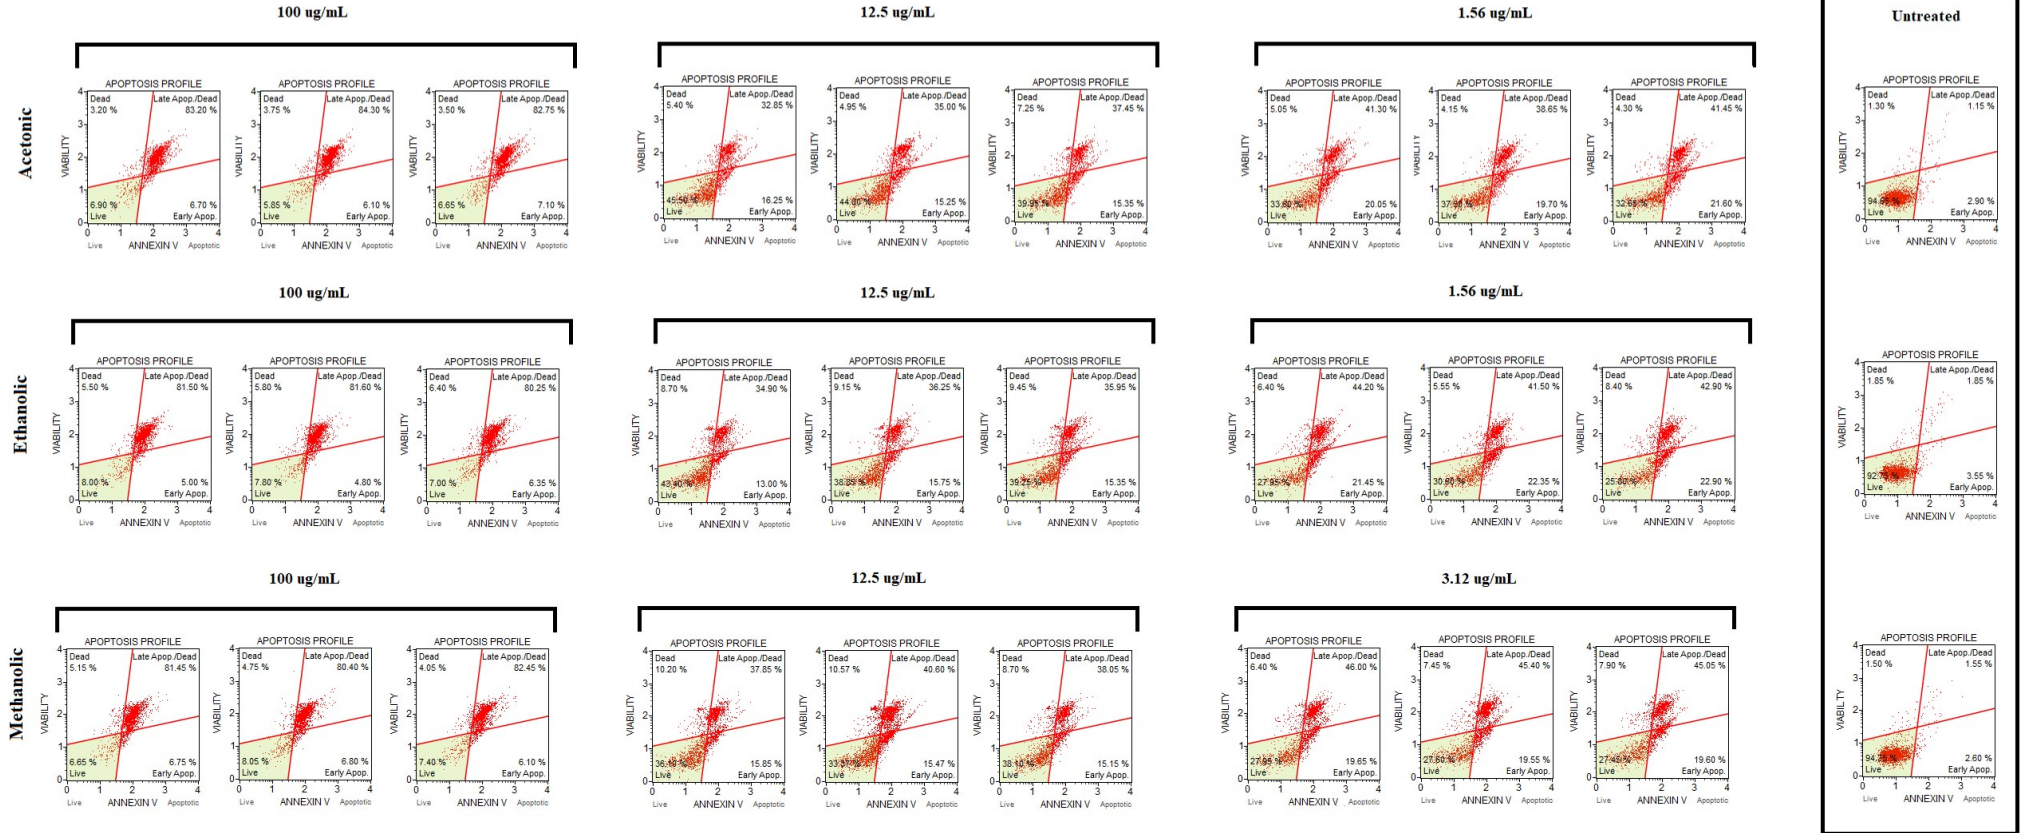

*Lobaria pulmonaria*

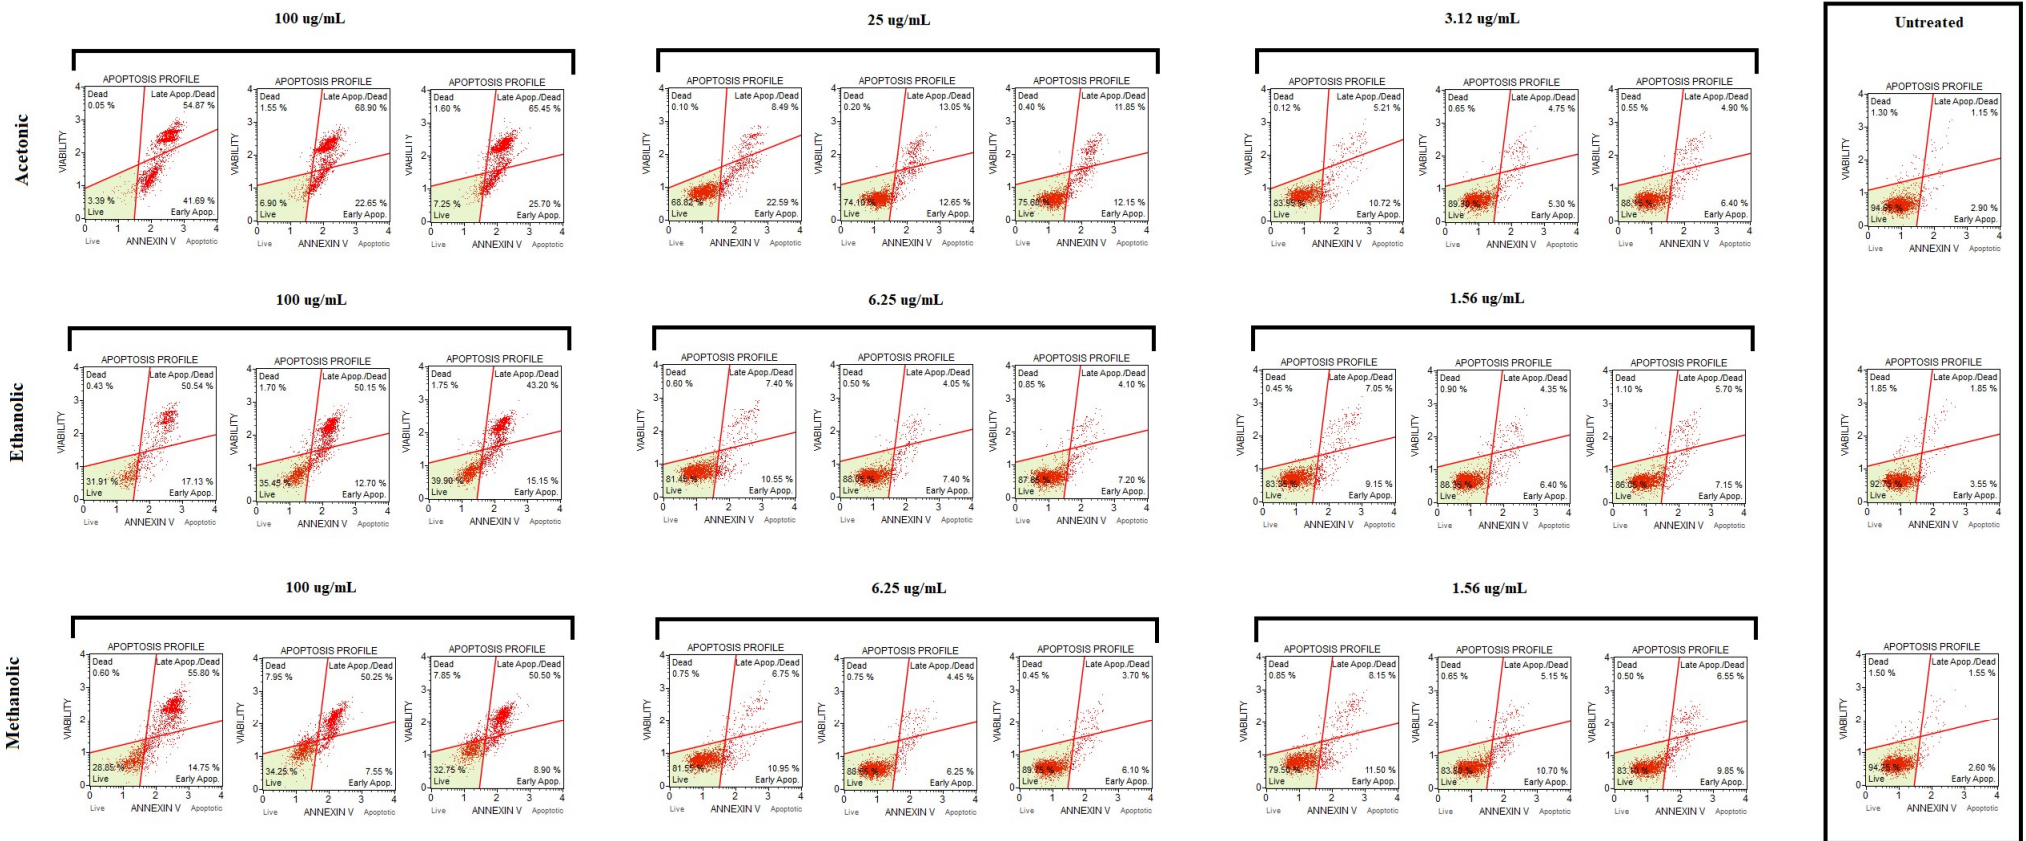

*Usnea florida*

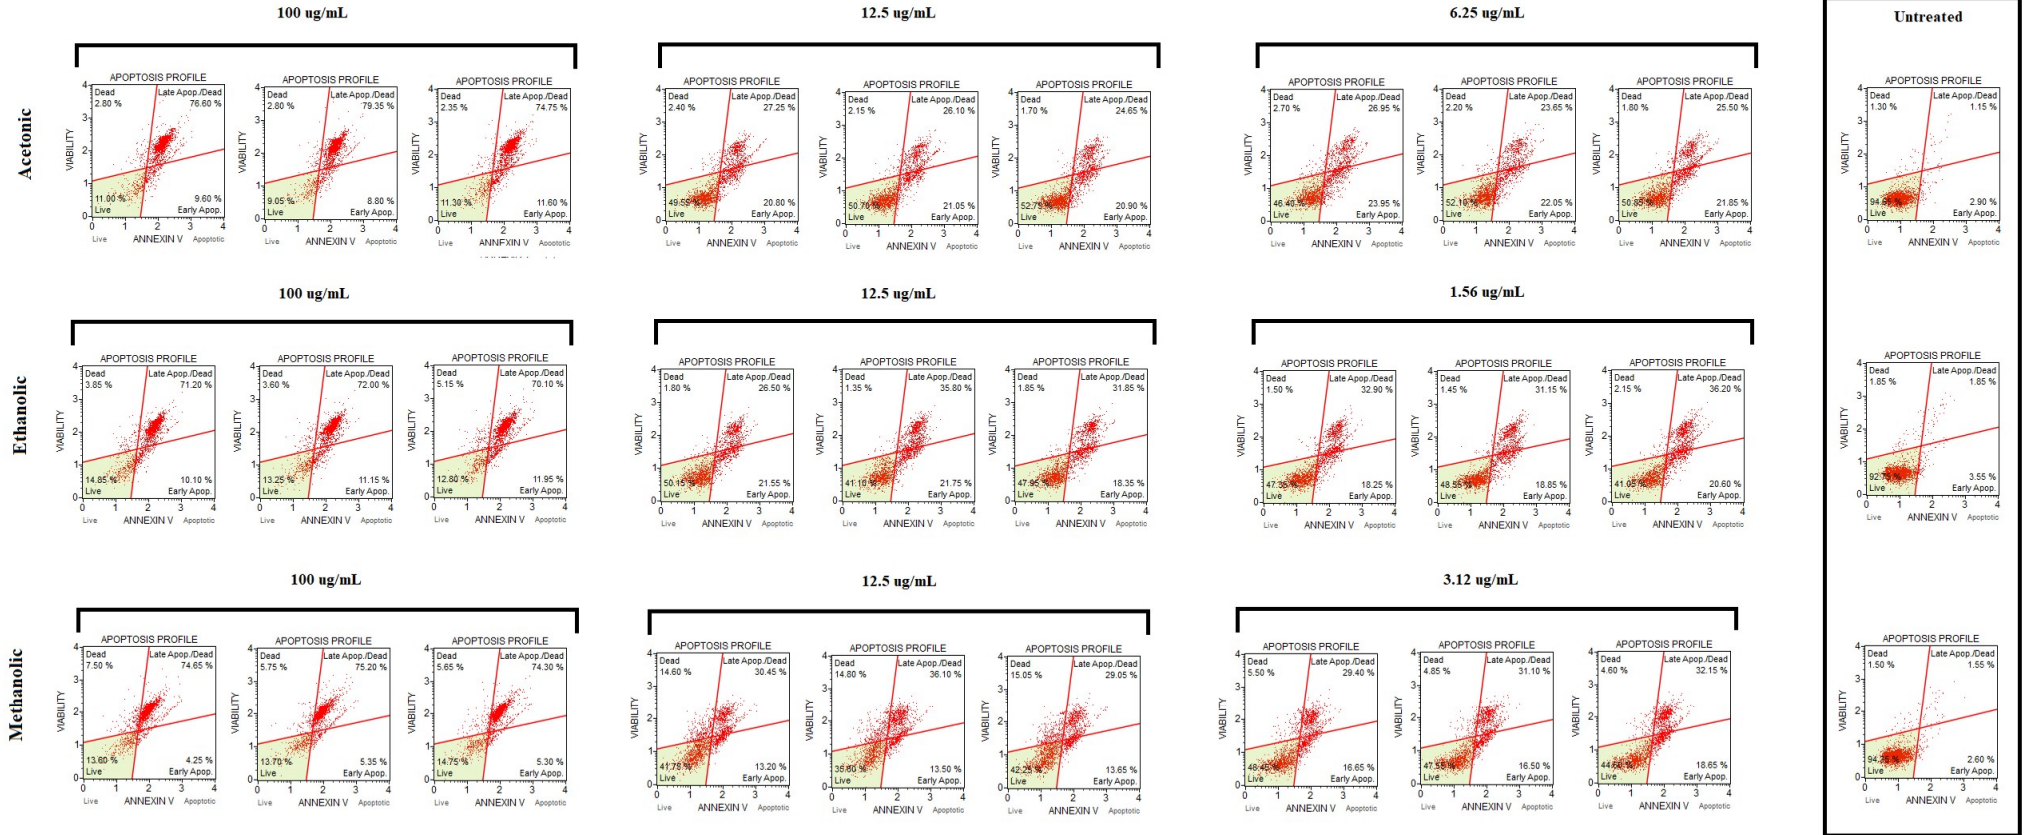

Supplement: pone.0238303.s002.pdf [file pone.0238303.s002.pdf]
