# Supplementary material for: Differential anti-proliferative and apoptotic effects of lichen species on human prostate carcinoma cells
Source: PubMed Central journal article supplement (PMC7527208; doi:10.1371/journal.pone.0238303), 2020-09-30
Supplement: pone.0238303.s001.pdf [file pone.0238303.s001.pdf]

*Bryoria capillaris*

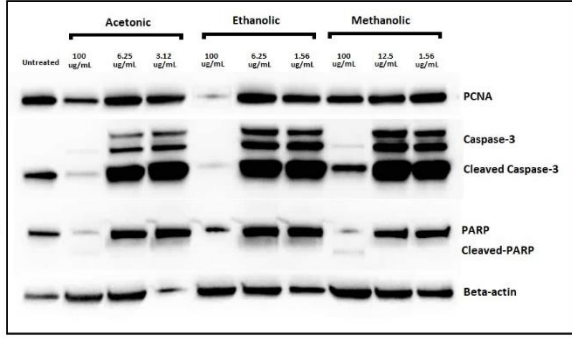

*Cladonia fimbriata*

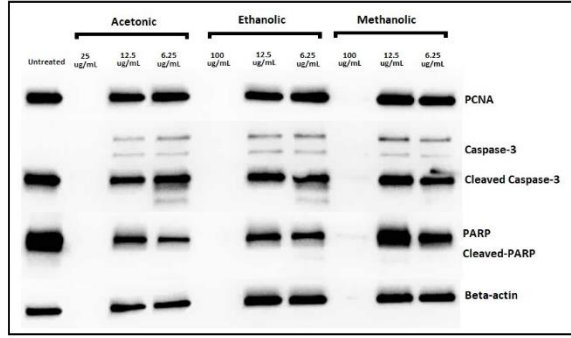

*Evernia divaricata*

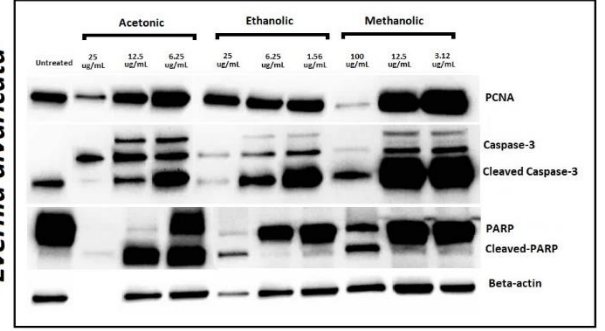

*Hypgyminia tubulosa*

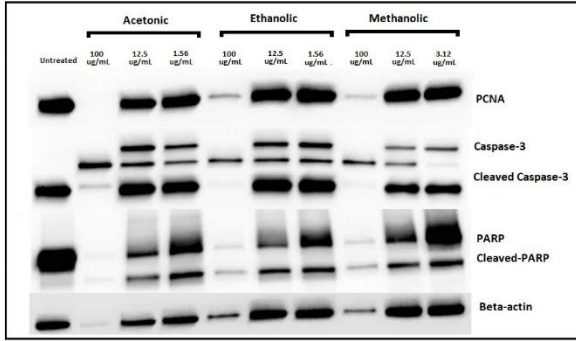

*Lobaria pulmonaria*

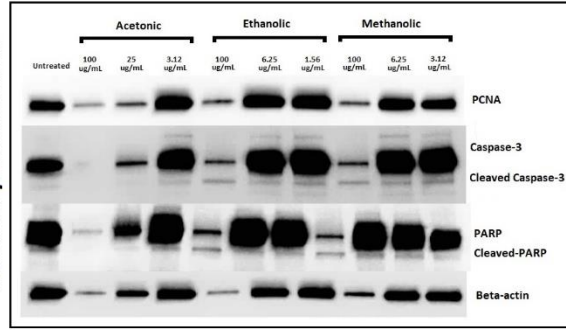

*Usnea florida*

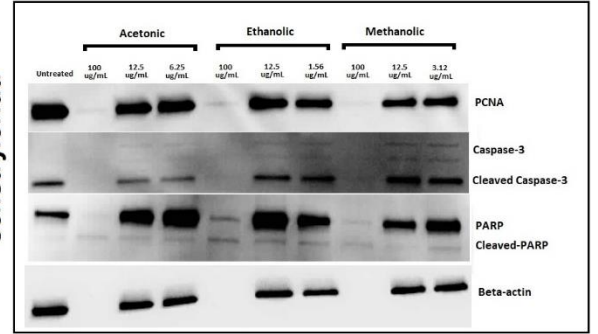

### BC- extraction

| Well Order                                          | Ladder-Control-A100-A6.25-A1.56-E100-E6.25-E1.56-M100-M12.5-M1.56<br>(A indicates Acetonic. E indicates Ethanolic. M indicates Methanolic)                                                                                                                |                                                                                                                                                                                                                                                             |
|-----------------------------------------------------|-----------------------------------------------------------------------------------------------------------------------------------------------------------------------------------------------------------------------------------------------------------|-------------------------------------------------------------------------------------------------------------------------------------------------------------------------------------------------------------------------------------------------------------|
| Beta-aktin<br>(retrieved<br>from 1sec<br>exposure)  | 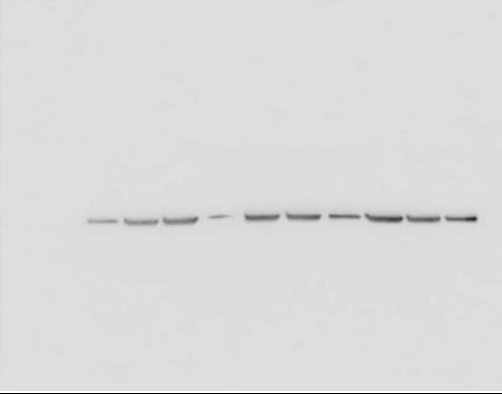 Western blot image showing Beta-aktin bands for 1-second exposure. The left panel shows a single row of bands across all lanes, indicating consistent protein levels.   |  Western blot image showing Beta-aktin bands for 1-second exposure. The right panel shows a single row of bands across all lanes, indicating consistent protein levels.   |
| Beta-aktin<br>(retrieved<br>from 10sec<br>exposure) |  Western blot image showing Beta-aktin bands for 10-second exposure. The left panel shows a single row of bands across all lanes, indicating consistent protein levels. |  Western blot image showing Beta-aktin bands for 10-second exposure. The right panel shows a single row of bands across all lanes, indicating consistent protein levels. |
| Beta-aktin<br>(retrieved<br>from 3min<br>exposure)  |  Western blot image showing Beta-aktin bands for 3-minute exposure. The left panel shows a single row of bands across all lanes, indicating consistent protein levels. |  Western blot image showing Beta-aktin bands for 3-minute exposure. The right panel shows a single row of bands across all lanes, indicating consistent protein levels. |

|                                                     |                                                                                     |                                                                                      |
|-----------------------------------------------------|-------------------------------------------------------------------------------------|--------------------------------------------------------------------------------------|
| <p>PCNA<br/>(retrieved from 1sec exposure)</p>      |    |    |
| <p>Caspase-3<br/>(retrieved from 3min exposure)</p> |   |   |
| <p>PARP<br/>(retrieved from 10sec exposure)</p>     |  |  |

### CF-extraction

| Well Order                                             | Ladder-Control-A100-A12.5-A6.25-E100-E-12.5-E6.25-M100-M12.5-M6.25<br>(A indicates Acetonic. E indicates Ethanolic. M indicates Methanolic) |  |
|--------------------------------------------------------|---------------------------------------------------------------------------------------------------------------------------------------------|--|
| Beta-aktin<br>(retrieved<br>from 3sec<br>exposure)     |                                                                                                                                             |  |
| Beta-aktin<br>(retrieved<br>from<br>10sec<br>exposure) |                                                                                                                                             |  |
| Beta-aktin<br>(retrieved<br>from<br>45sec<br>exposure) |                                                                                                                                             |  |

|                                                                  |                                                                                     |                                                                                      |
|------------------------------------------------------------------|-------------------------------------------------------------------------------------|--------------------------------------------------------------------------------------|
| <p>PCNA<br/>(retrieved<br/>from 3sec<br/>exposure)</p>           |    |    |
| <p>Caspase-3<br/>(retrieved<br/>from<br/>45sec<br/>exposure)</p> |   |   |
| <p>PARP<br/>(retrieved<br/>from<br/>10sec<br/>exposure)</p>      |  |  |

**ED-A extraction**

| Well Order                                   | A25-A12.5-A6.25-Ladder<br>(A indicates Acetonic)                                    |                                                                                      |
|----------------------------------------------|-------------------------------------------------------------------------------------|--------------------------------------------------------------------------------------|
| Beta-aktin<br>(retrieved from 8sec exposure) |   |   |
| Beta-aktin<br>(retrieved from 3min exposure) |  |  |
| PCNA<br>(retrieved from 5sec exposure)       |  |  |

| Well order                                  | Ladder-Control-A25-A12.5-A6.25<br>(E indicates Ethanolic. M indicates Methanolic)   |
|---------------------------------------------|-------------------------------------------------------------------------------------|
| Caspase-3<br>(retrieved from 3min exposure) | 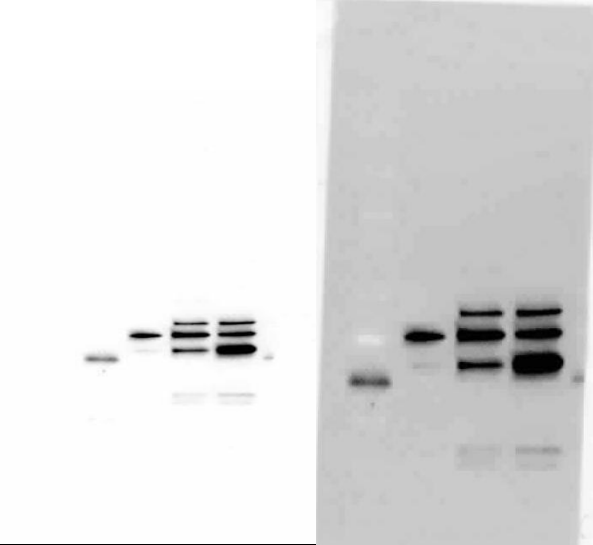  |
| PARP<br>(retrieved from 8sec exposure)      |  |

### ED-E and ED-M extraction

| Well Order                                             | Ladder-Control-E25-E6.25-E1.56-M100-M12.5-M3.12<br>(A indicates Acetonic. E indicates Ethanolic. M indicates Methanolic) |                                                                                      |
|--------------------------------------------------------|--------------------------------------------------------------------------------------------------------------------------|--------------------------------------------------------------------------------------|
| Beta-aktin<br>(retrieved<br>from 1sec<br>exposure)     | 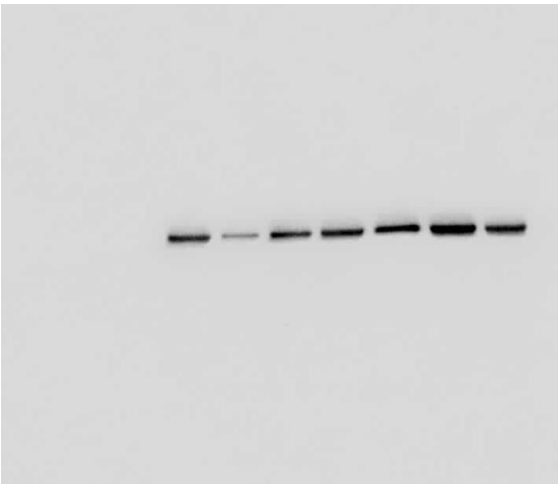                                        |    |
| Beta-aktin<br>(retrieved<br>from<br>10sec<br>exposure) |                                        |   |
| PCNA<br>(retrieved<br>from 1sec<br>exposure)           |                                       |  |



Caspase-3  
(retrieved  
from  
10sec  
exposure)

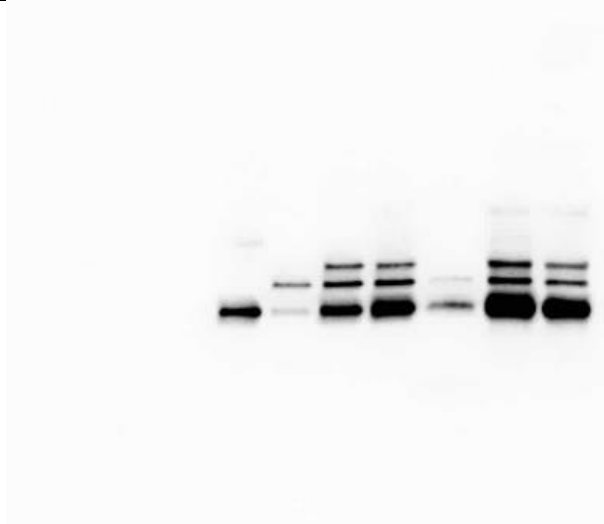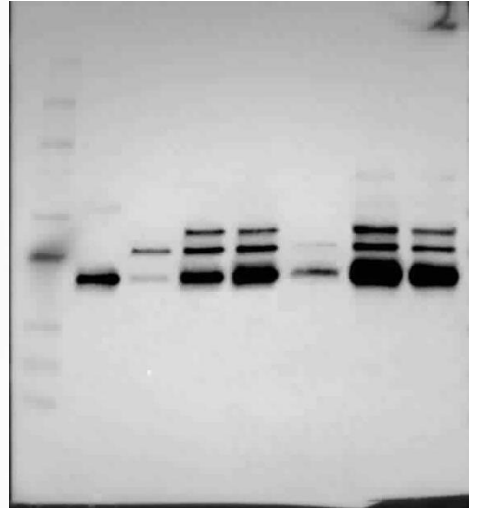

PARP  
(retrieved  
from  
10sec  
exposure)

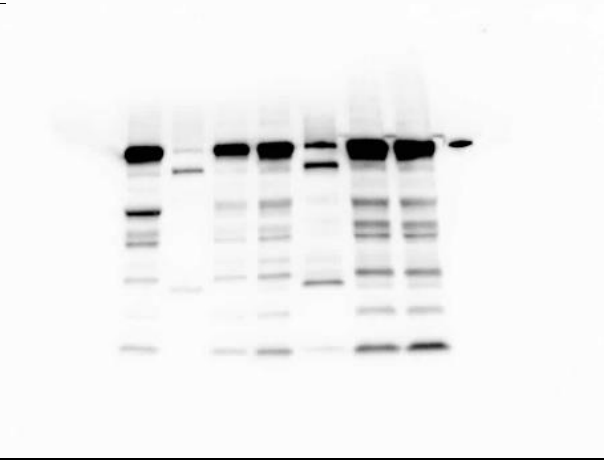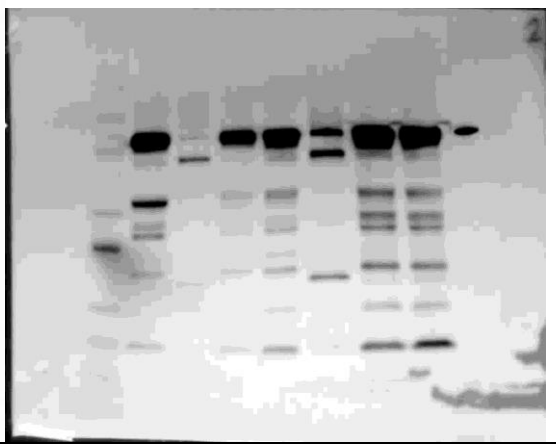

### HT-extraction

| Well Order                                          | Ladder-Control-A100-A12.5-1.56-E100-E12.5-E1.56-M100-M12.5-M3.12<br>(A indicates Acetonic. E indicates Ethanolic. M indicates Methanolic)                                                                                                                                                                                         |                                                                                                                                                                                                                                                                                                                                     |
|-----------------------------------------------------|-----------------------------------------------------------------------------------------------------------------------------------------------------------------------------------------------------------------------------------------------------------------------------------------------------------------------------------|-------------------------------------------------------------------------------------------------------------------------------------------------------------------------------------------------------------------------------------------------------------------------------------------------------------------------------------|
| Beta-aktin<br>(retrieved<br>from 5sec<br>exposure)  | 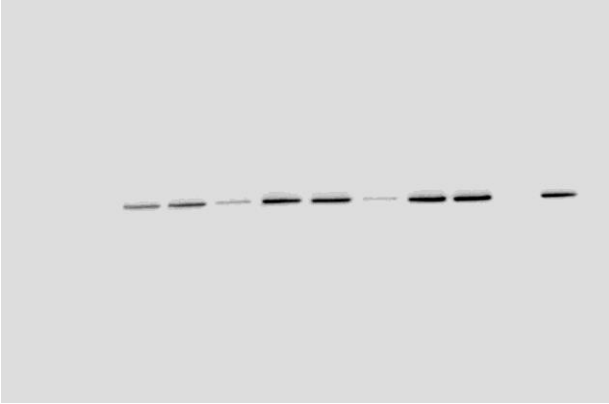 Western blot showing Beta-aktin levels for 5sec exposure. The left panel shows a single row of bands across 11 lanes, with the last lane being a control. The bands are relatively faint and uniform in intensity.                              |  Western blot showing Beta-aktin levels for 5sec exposure. The right panel shows a single row of bands across 11 lanes, with the last lane being a control. The bands are faint and uniform in intensity.                                         |
| Beta-aktin<br>(retrieved<br>from 10sec<br>exposure) |  Western blot showing Beta-aktin levels for 10sec exposure. The left panel shows a single row of bands across 11 lanes, with the last lane being a control. The bands are slightly more prominent than in the 5sec exposure.                    |  Western blot showing Beta-aktin levels for 10sec exposure. The right panel shows a single row of bands across 11 lanes, with the last lane being a control. The bands are slightly more prominent than in the 5sec exposure.                    |
| Beta-aktin<br>(retrieved<br>from 3min<br>exposure)  |  Western blot showing Beta-aktin levels for 3min exposure. The left panel shows a single row of bands across 11 lanes, with the last lane being a control. The bands are significantly more intense and thicker than in the shorter exposures. |  Western blot showing Beta-aktin levels for 3min exposure. The right panel shows a single row of bands across 11 lanes, with the last lane being a control. The bands are significantly more intense and thicker than in the shorter exposures. |

|                                                             |                                                                                                     |                                                                                      |
|-------------------------------------------------------------|-----------------------------------------------------------------------------------------------------|--------------------------------------------------------------------------------------|
| <p>PCNA<br/>(retrieved<br/>from 2sec<br/>exposure)</p>      | 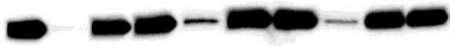                   |    |
| <p>Caspase-3<br/>(retrieved<br/>from 3min<br/>exposure)</p> |  <p>ladder ↑</p> |                                                                                      |
| <p>PARP<br/>(retrieved<br/>from 10sec<br/>exposure)</p>     |                  |  |

### LP-extraction

| Well Order                                          | Ladder-Control-A100-A25-A3.12-E100-E6.25-E1.56-M100-M6.25-M1.56<br>(A indicates Acetonic. E indicates Ethanolic. M indicates Methanolic)                                                                                                   |                                                                                                                                                                                                                                             |
|-----------------------------------------------------|--------------------------------------------------------------------------------------------------------------------------------------------------------------------------------------------------------------------------------------------|---------------------------------------------------------------------------------------------------------------------------------------------------------------------------------------------------------------------------------------------|
| Beta-aktin<br>(retrieved<br>from 1sec<br>exposure)  | 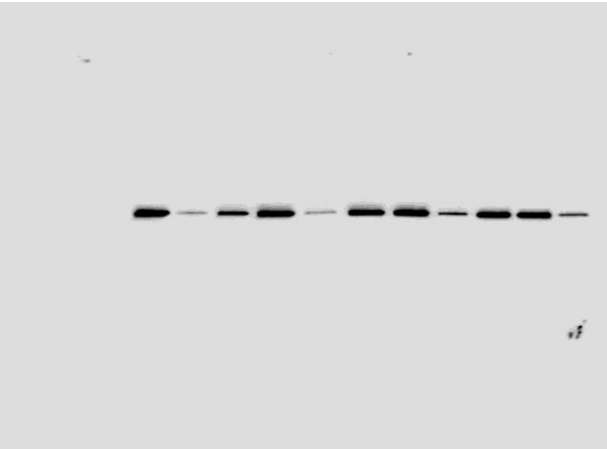 Western blot showing Beta-aktin bands across 12 lanes. The bands are of uniform intensity, indicating consistent protein levels across all conditions.   |  Western blot showing Beta-aktin bands across 12 lanes. The bands are of uniform intensity, indicating consistent protein levels across all conditions.   |
| Beta-aktin<br>(retrieved<br>from 3sec<br>exposure)  |  Western blot showing Beta-aktin bands across 12 lanes. The bands are of uniform intensity, indicating consistent protein levels across all conditions.  |  Western blot showing Beta-aktin bands across 12 lanes. The bands are of uniform intensity, indicating consistent protein levels across all conditions.  |
| Beta-aktin<br>(retrieved<br>from 10sec<br>exposure) |  Western blot showing Beta-aktin bands across 12 lanes. The bands are of uniform intensity, indicating consistent protein levels across all conditions. |  Western blot showing Beta-aktin bands across 12 lanes. The bands are of uniform intensity, indicating consistent protein levels across all conditions. |

|                                                              |                                                                                                                                                                                                                                                                              |                                                                                                                                                                                                                                                                                                     |
|--------------------------------------------------------------|------------------------------------------------------------------------------------------------------------------------------------------------------------------------------------------------------------------------------------------------------------------------------|-----------------------------------------------------------------------------------------------------------------------------------------------------------------------------------------------------------------------------------------------------------------------------------------------------|
| <p>PCNA<br/>(retrieved<br/>from 1sec<br/>exposure)</p>       |  <p>Western blot showing PCNA levels at 1 second exposure. The image displays a single row of bands across multiple lanes, with a consistent intensity of bands across all lanes.</p>       |  <p>Western blot showing PCNA levels at 1 second exposure, presented as an inverted image. The bands are clearly visible against a dark background, showing uniform intensity across all lanes.</p>               |
| <p>Caspase-3<br/>(retrieved<br/>from 10sec<br/>exposure)</p> |  <p>Western blot showing Caspase-3 levels at 10 second exposure. The image shows multiple lanes with bands of varying intensity, indicating an increase in Caspase-3 levels over time.</p> |  <p>Western blot showing Caspase-3 levels at 10 second exposure, presented as an inverted image. The bands are clearly visible against a dark background, showing an increase in intensity across the lanes.</p> |
| <p>PARP<br/>(retrieved<br/>from 3sec<br/>exposure)</p>       |  <p>Western blot showing PARP levels at 3 second exposure. The image shows multiple lanes with bands of varying intensity, indicating an increase in PARP levels over time.</p>           |  <p>Western blot showing PARP levels at 3 second exposure, presented as an inverted image. The bands are clearly visible against a dark background, showing an increase in intensity across the lanes.</p>      |

### UF-extraction

| Well Order                                          | Ladder-Control-A100-A12.5-A6.25-E100-E12.5-E1.56-M100-M12.5-M3.12<br>(A indicates Acetonic. E indicates Ethanolic. M indicates Methanolic)                                                                                 |                                                                                                                                                                                                                           |
|-----------------------------------------------------|----------------------------------------------------------------------------------------------------------------------------------------------------------------------------------------------------------------------------|---------------------------------------------------------------------------------------------------------------------------------------------------------------------------------------------------------------------------|
| Beta-aktin<br>(retrieved<br>from 1sec<br>exposure)  |  Western blot showing Beta-aktin bands for 1-second exposure. The bands are faint and barely visible across all lanes.                    |  Western blot showing Beta-aktin bands for 1-second exposure. The bands are very faint and difficult to discern against the background. |
| Beta-aktin<br>(retrieved<br>from 15sec<br>exposure) |  Western blot showing Beta-aktin bands for 15-second exposure. The bands are significantly more prominent than in the 1-second exposure. |  Western blot showing Beta-aktin bands for 15-second exposure. The bands are clearly visible and of moderate intensity.                |
| Beta-aktin<br>(retrieved<br>from 30sec<br>exposure) |  Western blot showing Beta-aktin bands for 30-second exposure. The bands are very dark and intense.                                     |  Western blot showing Beta-aktin bands for 30-second exposure. The bands are very dark and intense, similar to the left panel.        |

|                                                              |                                                                                     |                                                                                      |
|--------------------------------------------------------------|-------------------------------------------------------------------------------------|--------------------------------------------------------------------------------------|
| <p>PCNA<br/>(retrieved<br/>from 1sec<br/>exposure)</p>       | 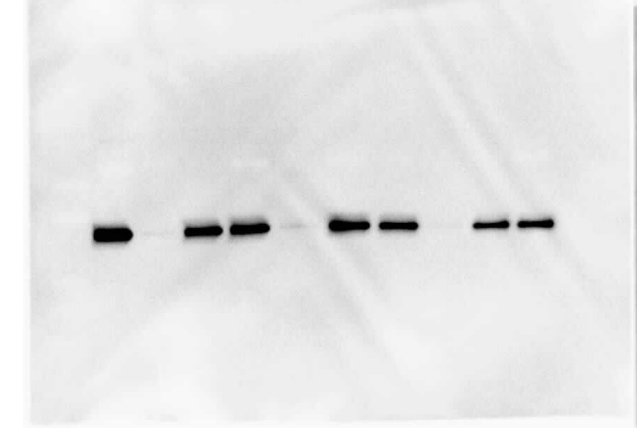   |    |
| <p>Caspase-3<br/>(retrieved<br/>from 30sec<br/>exposure)</p> |   |   |
| <p>PARP<br/>(retrieved<br/>from 30sec<br/>exposure)</p>      |  |  |
